# Supplementary material for: Female bias in an immigratory population of Cnaphalocrocis medinalis moths based on field surveys and laboratory tests
Source: PubMed Central journal article supplement (PMC6895038; doi:10.1038/s41598-019-54721-x), 2019-12-05
Supplement: 41598_2019_54721_MOESM1_ESM.pdf [file 41598_2019_54721_MOESM1_ESM.pdf]

1 **Female bias in an immigratory population of *Cnaphalocrocis***  
2 ***medinalis* moths based on field surveys and laboratory tests**

3  
4 Jia-Wen Guo <sup>1</sup>, Fan Yang <sup>1,2</sup>, Ping Li <sup>1</sup>, Xiang-Dong Liu <sup>1</sup>, Qiu-Lin Wu <sup>1,3</sup>, Gao Hu <sup>1,\*</sup>, Bao-  
5 Ping Zhai <sup>1,\*</sup>

6  
7 1. Key Laboratory of Integrated Management of Crop Diseases and Pests (Ministry of Education), College of Plant  
8 Protection, Nanjing Agricultural University, Nanjing, China

9 2. Vegetable Research Institute, Wuhan Academy of Agricultural Science and Technology, Wuhan, China.

10 3. State Key Laboratory for Biology of Plant Diseases and Insect Pests, Institute of Plant Protection, Chinese  
11 Academy of Agricultural Sciences, Beijing, China

12

13 \* Corresponding authors: Gao Hu, Bao-Ping Zhai

14 Street address: No. 1 Weigang Road, Xuanwu District, Nanjing 210095, China

15 E-mail address: [bpzhai@njau.edu.cn](mailto:bpzhai@njau.edu.cn) (B. Zhai), [hugao@njau.edu.cn](mailto:hugao@njau.edu.cn) (G. Hu)

16 Telephone number: +86(0)2584396204 (B. Zhai), +86(0)2584396381 (G. Hu)

17

18

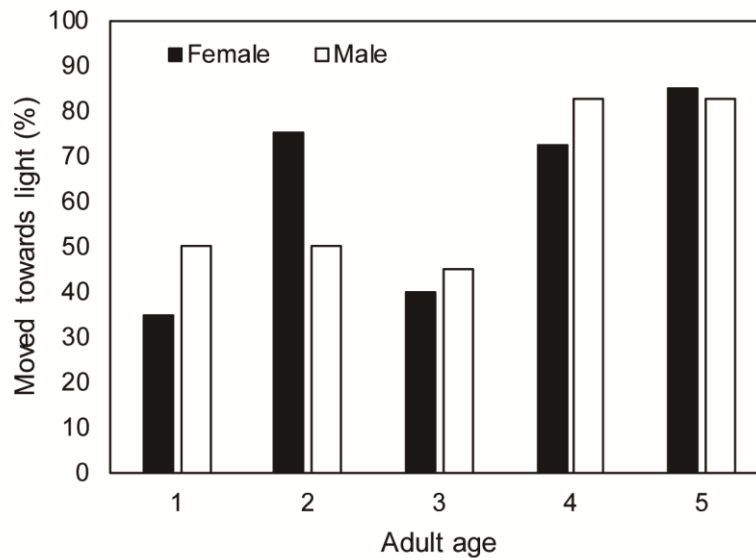

20 **Supplementary Fig. S1. The percentage of adult *C. medinalis* moths that first moved**  
 21 **towards the light.** A total of 280 healthy moths were selected and tested. The equipment used  
 22 to study phototaxis was similar to a positive phototaxis experimental apparatus used in a  
 23 previous experiment, with slight modifications <sup>1</sup>. Newly emerged unpaired female and male  
 24 moths were transferred daily to an experimental cup on the left side of an opaque test channel  
 25 (containing a cotton ball soaked with a 5% honey solution). The light source consisted of a trap  
 26 light (PS-15II type, Jiaduo Science, Industry and Trade Co., Ltd., Hebi, Henan, China)  
 27 commonly used for pest monitoring and control (15 W;  $\lambda=320-680$  nm). The lights were turned  
 28 on for 12 hours (from 19:00 to 7:00) each day. Once the light was turned off, the number of  
 29 adults moving towards the right observation cup in each treatment was recorded. The  
 30 experiment was carried out at  $26 \pm 1$  °C. One- to five-day-old *C. medinalis* showed no sex  
 31 differences in phototaxis (1-day-old:  $\chi^2=0.921$ ,  $df=1$ ,  $P=0.337$ ; 2-day-old:  $\chi^2=2.667$ ,  $df=1$ ,  
 32  $P=0.102$ ; 3-day-old:  $\chi^2=0.102$ ,  $df=1$ ,  $P=0.749$ ; 4-day-old:  $\chi^2=1.147$ ,  $df=1$ ,  $P=0.284$ ; 5-day-old:  
 33  $\chi^2=0.092$ ,  $df=1$ ,  $P=0.762$ ).

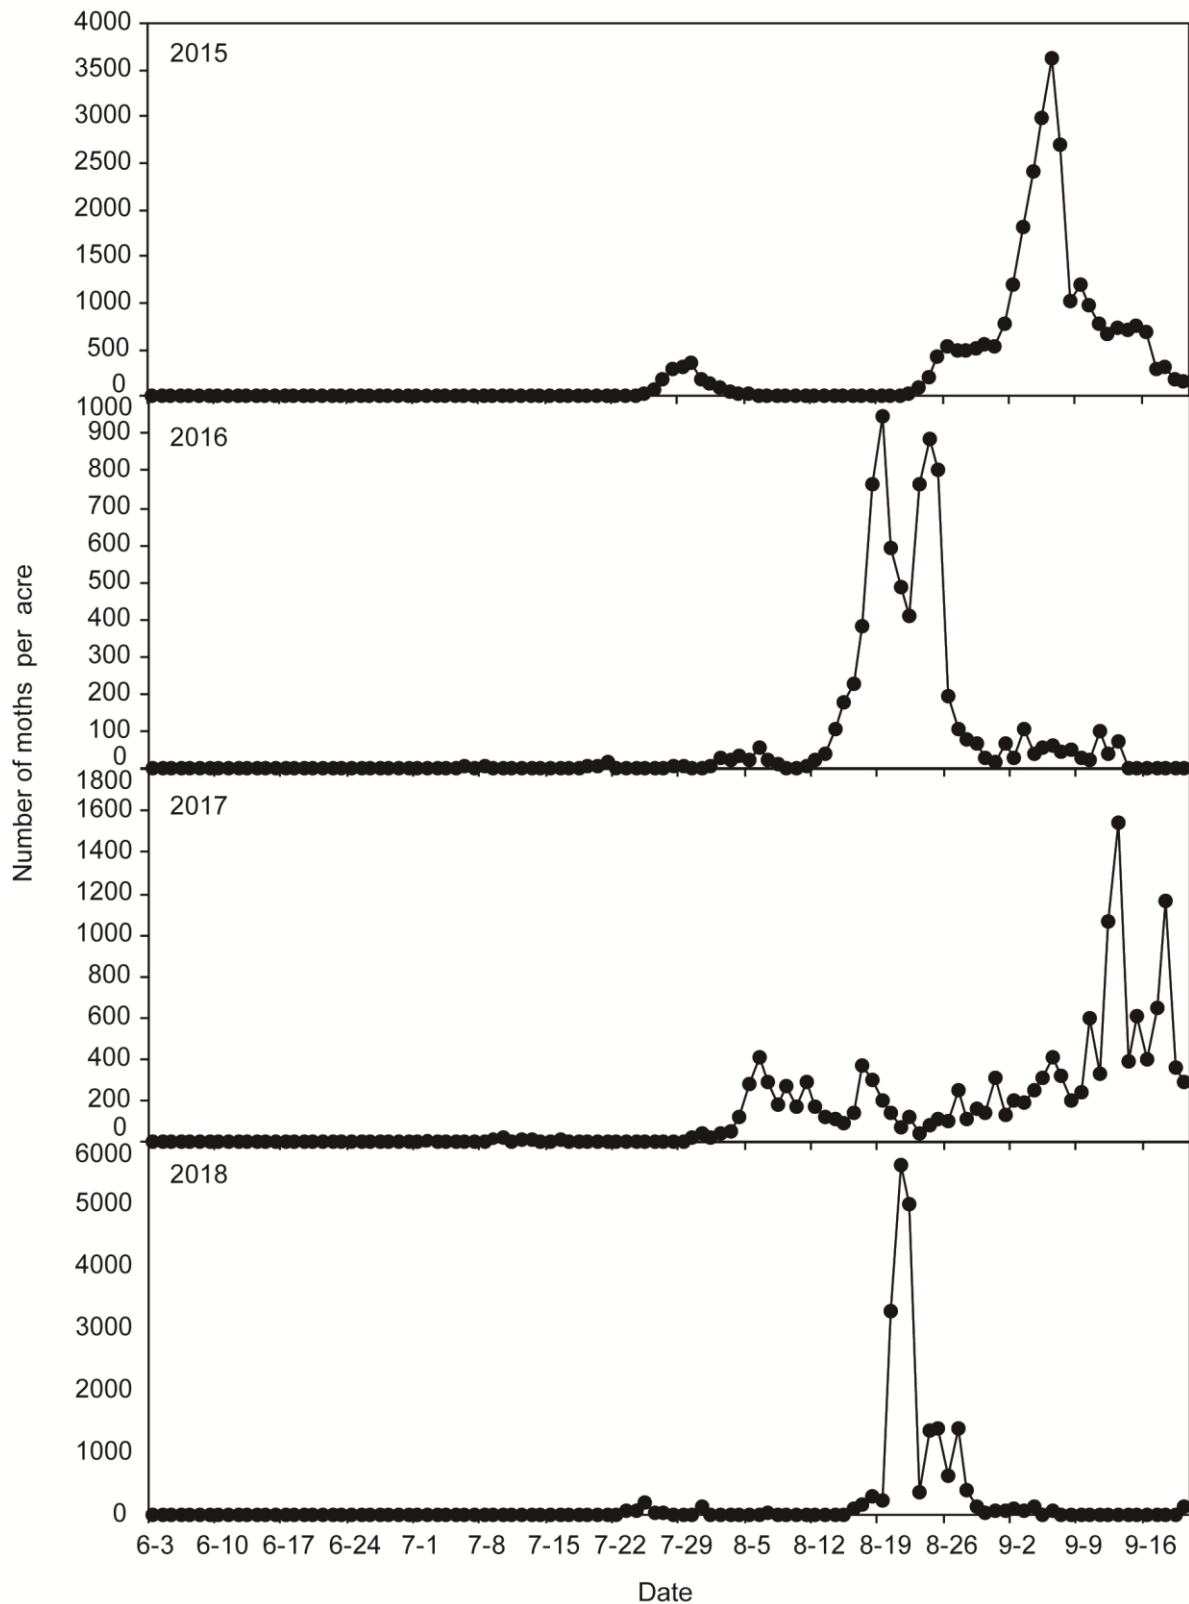

34

35 **Supplementary Fig. S2. Population dynamics of *C. medinalis* moths in Jiangyan, China.**

36 The abundance of moths was recorded by using a survey carried out at 6 am (BJT), with a

37 method based on that described by Wang *et al.* <sup>2</sup>.

38 **Supplementary Table S1. Abundance and female ovarian development of *C. medinalis***  
 39 **moths in Jiangyan, China.**

| Year | Period  | No. of<br>moths<br>per acre | No. of<br>moths<br>dissected | Population size of moths<br>in each stage of ovarian<br>development |          |             | Population<br>characteristics |
|------|---------|-----------------------------|------------------------------|---------------------------------------------------------------------|----------|-------------|-------------------------------|
|      |         |                             |                              | Level I                                                             | Level II | ≥ Level III |                               |
| 2017 | 27 July | 1150                        | 91                           | 3.30                                                                | 13.19    | 83.52       | Mostly<br>immigrants          |
|      | 15 Aug  |                             |                              |                                                                     |          |             |                               |
| 2018 | 27 July | 51                          | 26                           | 0                                                                   | 19.23    | 80.77       | Mostly<br>immigrants          |
|      | 12 Aug  |                             |                              |                                                                     |          |             |                               |

40 Female moths of *C. medinalis* were collected from rice fields and dissected once every two  
 41 days to determine their ovarian developmental stages according to the criteria described by  
 42 Zhang *et al.*<sup>3</sup>. Before August 12, the *C. medinalis* moths in the field in Jiangyan, China, were  
 43 the immigratory population.

44

45 **References**

- 46 1. Wan, G. J. *et al.* Reduced geomagnetic field may affect positive phototaxis and flight  
47 capacity of a migratory rice planthopper. *Anim. Behav.* **121**, 107-116,  
48 doi:10.1016/j.anbehav.2016.08.024 (2016).
- 49 2. Wang, F. Y. *et al.* Determining the migration duration of rice leaf folder (*Cnaphalocrocis*  
50 *medinalis* (Guenée)) moths using a trajectory analytical approach. *Sci. Rep.* **7**, 39853,  
51 doi:10.1038/srep39853 (2017).
- 52 3. Zhang, X. X., Lu, Z. Q. & Geng, J. G. Application of ovarian dissection of female  
53 *Cnaphalocrocis medinalis* moths in prediction and forecasting system. *Entomological*  
54 *Knowledge* **16**, 97-99 (1979).

55
